# Supplementary material
Source: PubMed Central journal article supplement (PMC6422025)

## SUPPLEMENTARY INFORMATION

**Table S1.** Unmappable Ensembl ID.

**Table S2.** Contributory genes to the top 10 IPA pathways, by region.

**Fig. S1.** Additional differentially regulated neurotransmission and signal transduction-associated transcripts in white matter after brain irradiation. Several neurotransmission and signal transduction transcripts were downregulated in white matter after brain irradiation. Potassium two pore domain channel subfamily K member (KCNK5) was upregulated within both irradiated groups. Differential expressed genes are listed in order of direction and then alphabetically within treatment groups. Bar: Mean log<sub>2</sub>fold change. Error bars: log fold change standard error. \*Log<sub>2</sub> fold changes  $< \pm 1$  and multiplicity adjusted p values (Benjamini-Hochberg)  $< 0.05$ .

**Table S1**

| Treatment | Region | Proportion Unmappable DEGs |         | Protein Coding |           | Pseudogene |          | miRNA |          | snf   |
|-----------|--------|----------------------------|---------|----------------|-----------|------------|----------|-------|----------|-------|
| fWBI      | DLPFC  | 3/55                       | (5.45%) | 1/3            | (33.33%)  | 1/3        | (33.33%) | 0/3   | (0.00%)  | 1/3   |
| fWBI      | HC     | 1/32                       | (3.13%) | 1/1            | (100.00%) | 0/1        | (0.00%)  | 0/1   | (0.00%)  | 0/1   |
| fWBI      | WM     | 130/1815                   | (7.16%) | 76/130         | (58.46%)  | 24/130     | (18.46%) | 8/130 | (6.15%)  | 8/130 |
| TBI       | DLPFC  | 0/2                        | (0.00%) | 0/0            | (0.00%)   | 0/0        | (0.00%)  | 0/0   | (0.00%)  | 0/0   |
| TBI       | HC     | 0/0                        | (0.00%) | 0/0            | (0.00%)   | 0/0        | (0.00%)  | 0/0   | (0.00%)  | 0/0   |
| TBI       | WM     | 7/172                      | (4.07%) | 3/7            | (42.86%)  | 2/7        | (28.57%) | 1/7   | (14.29%) | 1/7   |

| rNA      | snoRNA |          | Other |         |
|----------|--------|----------|-------|---------|
| (33.33%) | 0/3    | (0.00%)  | 0/3   | (0.00%) |
| (0.00%)  | 0/1    | (0.00%)  | 0/1   | (0.00%) |
| (6.15%)  | 13/130 | (10.00%) | 1/130 | (0.00%) |
| (0.00%)  | 0/0    | (0.00%)  | 0/0   | (0.00%) |
| (0.00%)  | 0/0    | (0.00%)  | 0/0   | (0.00%) |
| (14.29%) | 0/7    | (0.00%)  | 0/7   | (0.00%) |

| <b>Group</b>                         | <b>Region</b> | <b>Ensembl ID</b>  |
|--------------------------------------|---------------|--------------------|
| Fractionated Whole Brain Irradiation | DLPFC         | ENSMMUG00000012220 |
| Fractionated Whole Brain Irradiation | DLPFC         | ENSMMUG00000028145 |
| Fractionated Whole Brain Irradiation | DLPFC         | ENSMMUG00000029925 |
| Fractionated Whole Brain Irradiation | Hippocampus   | ENSMMUG00000023043 |
| Total Body Irradiation               | White Matter  | ENSMMUG00000029813 |
| Total Body Irradiation               | White Matter  | ENSMMUG00000006365 |
| Total Body Irradiation               | White Matter  | ENSMMUG00000009880 |
| Total Body Irradiation               | White Matter  | ENSMMUG00000014842 |
| Total Body Irradiation               | White Matter  | ENSMMUG00000031695 |
| Total Body Irradiation               | White Matter  | ENSMMUG00000033675 |
| Total Body Irradiation               | White Matter  | ENSMMUG00000028170 |
| Fractionated Whole Brain Irradiation | White Matter  | ENSMMUG00000029813 |
| Fractionated Whole Brain Irradiation | White Matter  | ENSMMUG00000033532 |
| Fractionated Whole Brain Irradiation | White Matter  | ENSMMUG00000034118 |
| Fractionated Whole Brain Irradiation | White Matter  | ENSMMUG00000034731 |
| Fractionated Whole Brain Irradiation | White Matter  | ENSMMUG00000035119 |
| Fractionated Whole Brain Irradiation | White Matter  | ENSMMUG00000035169 |
| Fractionated Whole Brain Irradiation | White Matter  | ENSMMUG00000036465 |
| Fractionated Whole Brain Irradiation | White Matter  | ENSMMUG00000028568 |
| Fractionated Whole Brain Irradiation | White Matter  | ENSMMUG00000027037 |
| Fractionated Whole Brain Irradiation | White Matter  | ENSMMUG00000023926 |
| Fractionated Whole Brain Irradiation | White Matter  | ENSMMUG00000025424 |
| Fractionated Whole Brain Irradiation | White Matter  | ENSMMUG00000026359 |
| Fractionated Whole Brain Irradiation | White Matter  | ENSMMUG00000026439 |
| Fractionated Whole Brain Irradiation | White Matter  | ENSMMUG00000026549 |
| Fractionated Whole Brain Irradiation | White Matter  | ENSMMUG00000026705 |
| Fractionated Whole Brain Irradiation | White Matter  | ENSMMUG00000036017 |
| Fractionated Whole Brain Irradiation | White Matter  | ENSMMUG00000027704 |
| Fractionated Whole Brain Irradiation | White Matter  | ENSMMUG00000025183 |
| Fractionated Whole Brain Irradiation | White Matter  | ENSMMUG00000036516 |
| Fractionated Whole Brain Irradiation | White Matter  | ENSMMUG00000036695 |
| Fractionated Whole Brain Irradiation | White Matter  | ENSMMUG00000037156 |
| Fractionated Whole Brain Irradiation | White Matter  | ENSMMUG00000026059 |
| Fractionated Whole Brain Irradiation | White Matter  | ENSMMUG00000024318 |
| Fractionated Whole Brain Irradiation | White Matter  | ENSMMUG00000027929 |
| Fractionated Whole Brain Irradiation | White Matter  | ENSMMUG00000027952 |
| Fractionated Whole Brain Irradiation | White Matter  | ENSMMUG00000028097 |
| Fractionated Whole Brain Irradiation | White Matter  | ENSMMUG00000028145 |
| Fractionated Whole Brain Irradiation | White Matter  | ENSMMUG00000028390 |
| Fractionated Whole Brain Irradiation | White Matter  | ENSMMUG00000028527 |
| Fractionated Whole Brain Irradiation | White Matter  | ENSMMUG00000034623 |
| Fractionated Whole Brain Irradiation | White Matter  | ENSMMUG00000002705 |
| Fractionated Whole Brain Irradiation | White Matter  | ENSMMUG00000003065 |
| Fractionated Whole Brain Irradiation | White Matter  | ENSMMUG00000004726 |
| Fractionated Whole Brain Irradiation | White Matter  | ENSMMUG00000005390 |
| Fractionated Whole Brain Irradiation | White Matter  | ENSMMUG00000005470 |

|                                      |              |                    |
|--------------------------------------|--------------|--------------------|
| Fractionated Whole Brain Irradiation | White Matter | ENSMMUG00000005472 |
| Fractionated Whole Brain Irradiation | White Matter | ENSMMUG00000005943 |
| Fractionated Whole Brain Irradiation | White Matter | ENSMMUG00000006099 |
| Fractionated Whole Brain Irradiation | White Matter | ENSMMUG00000006365 |
| Fractionated Whole Brain Irradiation | White Matter | ENSMMUG00000007632 |
| Fractionated Whole Brain Irradiation | White Matter | ENSMMUG00000007776 |
| Fractionated Whole Brain Irradiation | White Matter | ENSMMUG00000008000 |
| Fractionated Whole Brain Irradiation | White Matter | ENSMMUG00000008570 |
| Fractionated Whole Brain Irradiation | White Matter | ENSMMUG00000008765 |
| Fractionated Whole Brain Irradiation | White Matter | ENSMMUG00000008991 |
| Fractionated Whole Brain Irradiation | White Matter | ENSMMUG00000009078 |
| Fractionated Whole Brain Irradiation | White Matter | ENSMMUG00000009934 |
| Fractionated Whole Brain Irradiation | White Matter | ENSMMUG00000010270 |
| Fractionated Whole Brain Irradiation | White Matter | ENSMMUG00000010580 |
| Fractionated Whole Brain Irradiation | White Matter | ENSMMUG00000010920 |
| Fractionated Whole Brain Irradiation | White Matter | ENSMMUG00000011456 |
| Fractionated Whole Brain Irradiation | White Matter | ENSMMUG00000012134 |
| Fractionated Whole Brain Irradiation | White Matter | ENSMMUG00000012551 |
| Fractionated Whole Brain Irradiation | White Matter | ENSMMUG00000012566 |
| Fractionated Whole Brain Irradiation | White Matter | ENSMMUG00000012617 |
| Fractionated Whole Brain Irradiation | White Matter | ENSMMUG00000012877 |
| Fractionated Whole Brain Irradiation | White Matter | ENSMMUG00000012927 |
| Fractionated Whole Brain Irradiation | White Matter | ENSMMUG00000013192 |
| Fractionated Whole Brain Irradiation | White Matter | ENSMMUG00000013255 |
| Fractionated Whole Brain Irradiation | White Matter | ENSMMUG00000014208 |
| Fractionated Whole Brain Irradiation | White Matter | ENSMMUG00000015129 |
| Fractionated Whole Brain Irradiation | White Matter | ENSMMUG00000016488 |
| Fractionated Whole Brain Irradiation | White Matter | ENSMMUG00000016685 |
| Fractionated Whole Brain Irradiation | White Matter | ENSMMUG00000018452 |
| Fractionated Whole Brain Irradiation | White Matter | ENSMMUG00000019666 |
| Fractionated Whole Brain Irradiation | White Matter | ENSMMUG00000019716 |
| Fractionated Whole Brain Irradiation | White Matter | ENSMMUG00000021014 |
| Fractionated Whole Brain Irradiation | White Matter | ENSMMUG00000021300 |
| Fractionated Whole Brain Irradiation | White Matter | ENSMMUG00000021336 |
| Fractionated Whole Brain Irradiation | White Matter | ENSMMUG00000022953 |
| Fractionated Whole Brain Irradiation | White Matter | ENSMMUG00000023040 |
| Fractionated Whole Brain Irradiation | White Matter | ENSMMUG00000028759 |
| Fractionated Whole Brain Irradiation | White Matter | ENSMMUG00000028768 |
| Fractionated Whole Brain Irradiation | White Matter | ENSMMUG00000029021 |
| Fractionated Whole Brain Irradiation | White Matter | ENSMMUG00000029325 |
| Fractionated Whole Brain Irradiation | White Matter | ENSMMUG00000029444 |
| Fractionated Whole Brain Irradiation | White Matter | ENSMMUG00000029527 |
| Fractionated Whole Brain Irradiation | White Matter | ENSMMUG00000029528 |
| Fractionated Whole Brain Irradiation | White Matter | ENSMMUG00000029798 |
| Fractionated Whole Brain Irradiation | White Matter | ENSMMUG00000029841 |
| Fractionated Whole Brain Irradiation | White Matter | ENSMMUG00000029853 |
| Fractionated Whole Brain Irradiation | White Matter | ENSMMUG00000030055 |

|                                      |              |                    |
|--------------------------------------|--------------|--------------------|
| Fractionated Whole Brain Irradiation | White Matter | ENSMMUG00000030056 |
| Fractionated Whole Brain Irradiation | White Matter | ENSMMUG00000030059 |
| Fractionated Whole Brain Irradiation | White Matter | ENSMMUG00000030088 |
| Fractionated Whole Brain Irradiation | White Matter | ENSMMUG00000030215 |
| Fractionated Whole Brain Irradiation | White Matter | ENSMMUG00000030309 |
| Fractionated Whole Brain Irradiation | White Matter | ENSMMUG00000030481 |
| Fractionated Whole Brain Irradiation | White Matter | ENSMMUG00000030523 |
| Fractionated Whole Brain Irradiation | White Matter | ENSMMUG00000030625 |
| Fractionated Whole Brain Irradiation | White Matter | ENSMMUG00000030671 |
| Fractionated Whole Brain Irradiation | White Matter | ENSMMUG00000030992 |
| Fractionated Whole Brain Irradiation | White Matter | ENSMMUG00000030993 |
| Fractionated Whole Brain Irradiation | White Matter | ENSMMUG00000031074 |
| Fractionated Whole Brain Irradiation | White Matter | ENSMMUG00000031147 |
| Fractionated Whole Brain Irradiation | White Matter | ENSMMUG00000031262 |
| Fractionated Whole Brain Irradiation | White Matter | ENSMMUG00000031277 |
| Fractionated Whole Brain Irradiation | White Matter | ENSMMUG00000031531 |
| Fractionated Whole Brain Irradiation | White Matter | ENSMMUG00000031695 |
| Fractionated Whole Brain Irradiation | White Matter | ENSMMUG00000031839 |
| Fractionated Whole Brain Irradiation | White Matter | ENSMMUG00000032018 |
| Fractionated Whole Brain Irradiation | White Matter | ENSMMUG00000032021 |
| Fractionated Whole Brain Irradiation | White Matter | ENSMMUG00000032106 |
| Fractionated Whole Brain Irradiation | White Matter | ENSMMUG00000032345 |
| Fractionated Whole Brain Irradiation | White Matter | ENSMMUG00000032469 |
| Fractionated Whole Brain Irradiation | White Matter | ENSMMUG00000000418 |
| Fractionated Whole Brain Irradiation | White Matter | ENSMMUG00000001057 |
| Fractionated Whole Brain Irradiation | White Matter | ENSMMUG00000002572 |
| Fractionated Whole Brain Irradiation | White Matter | ENSMMUG00000005457 |
| Fractionated Whole Brain Irradiation | White Matter | ENSMMUG00000006926 |
| Fractionated Whole Brain Irradiation | White Matter | ENSMMUG00000010098 |
| Fractionated Whole Brain Irradiation | White Matter | ENSMMUG00000010233 |
| Fractionated Whole Brain Irradiation | White Matter | ENSMMUG00000011803 |
| Fractionated Whole Brain Irradiation | White Matter | ENSMMUG00000012725 |
| Fractionated Whole Brain Irradiation | White Matter | ENSMMUG00000014177 |
| Fractionated Whole Brain Irradiation | White Matter | ENSMMUG00000014406 |
| Fractionated Whole Brain Irradiation | White Matter | ENSMMUG00000014842 |
| Fractionated Whole Brain Irradiation | White Matter | ENSMMUG00000015136 |
| Fractionated Whole Brain Irradiation | White Matter | ENSMMUG00000019570 |
| Fractionated Whole Brain Irradiation | White Matter | ENSMMUG00000019648 |
| Fractionated Whole Brain Irradiation | White Matter | ENSMMUG00000020570 |
| Fractionated Whole Brain Irradiation | White Matter | ENSMMUG00000028735 |
| Fractionated Whole Brain Irradiation | White Matter | ENSMMUG00000028943 |
| Fractionated Whole Brain Irradiation | White Matter | ENSMMUG00000029253 |
| Fractionated Whole Brain Irradiation | White Matter | ENSMMUG00000029260 |
| Fractionated Whole Brain Irradiation | White Matter | ENSMMUG00000029852 |
| Fractionated Whole Brain Irradiation | White Matter | ENSMMUG00000029925 |
| Fractionated Whole Brain Irradiation | White Matter | ENSMMUG00000030903 |
| Fractionated Whole Brain Irradiation | White Matter | ENSMMUG00000031021 |

Fractionated Whole Brain Irradiation

White Matter

ENSMMUG00000028155

| Identifier/Function                  | Log2FoldChange | lfcSE       | adjusted p-value |
|--------------------------------------|----------------|-------------|------------------|
| C1ORF106                             | -1.001389415   | 0.189966075 | 0.0000390622     |
| U1, snRNA                            | -1.200939905   | 0.198544989 | 0.0000006119     |
| Uncharacterized, pseudogene          | 1.082758023    | 0.152847908 | 0.0000000010     |
| Uncharacterized, protein coding gene | 1.060347043    | 0.184811161 | 0.0000059033     |
| C4 Fragment                          | 1.479545794    | 0.380856282 | 0.0163778403     |
| Uncharacterized, protein coding gene | -1.189537336   | 0.344733816 | 0.0373182506     |
| Uncharacterized, pseudogene          | -1.308455626   | 0.380032671 | 0.0374999408     |
| Uncharacterized, pseudogene          | -1.107487706   | 0.262762348 | 0.0065507338     |
| Uncharacterized, protein coding gene | -1.241008177   | 0.329070369 | 0.0197563375     |
| miRNA                                | -1.536543727   | 0.37199738  | 0.0082941713     |
| U1, snRNA                            | -1.279162502   | 0.38659164  | 0.0476075469     |
| C4 Fragment, protein coding gene     | 3.371721502    | 0.480641769 | 0.0000000002     |
| miRNA                                | 2.18698821     | 0.583167036 | 0.002668589      |
| miRNA                                | -1.966105606   | 0.576508791 | 0.007807745      |
| miRNA                                | 1.956131756    | 0.618121527 | 0.015484237      |
| miRNA                                | -1.314370476   | 0.364997625 | 0.004335822      |
| miRNA                                | -1.624777397   | 0.577773941 | 0.038146843      |
| miRNA                                | 1.266001239    | 0.425693321 | 0.0256472817     |
| mml-mir-147b, miRNA                  | 1.889545254    | 0.596076422 | 0.0152343486     |
| mml-mir-9-1, miRNA                   | -1.304476026   | 0.418039823 | 0.0174568670     |
| SNORD113, snoRNA                     | -1.634964281   | 0.53591577  | 0.0211045801     |
| SNORD113, snoRNA                     | -1.619289455   | 0.579958136 | 0.0398576467     |
| SNORD113, snoRNA                     | -1.724979035   | 0.619622167 | 0.0405546501     |
| SNORD113, snoRNA                     | -1.673285949   | 0.580949314 | 0.0321538520     |
| SNORD113, snoRNA                     | -1.729226484   | 0.5983679   | 0.0313810134     |
| SNORD113, snoRNA                     | -1.670277669   | 0.618550878 | 0.0488956875     |
| SNORD113, snoRNA                     | -1.99111532    | 0.583538282 | 0.0077667181     |
| SNORD115, snoRNA                     | -1.454450473   | 0.447973539 | 0.0124119682     |
| SNORD116, snoRNA                     | -2.920531853   | 0.588684873 | 0.0000209253     |
| snoU13, snoRNA                       | -1.121452015   | 0.321099344 | 0.0060961543     |
| snoU13, snoRNA                       | -1.765545508   | 0.62363204  | 0.0364312341     |
| snoU13, snoRNA                       | -1.683375771   | 0.624265578 | 0.0493161209     |
| snoZ17, snoRNA                       | -1.507967614   | 0.51436526  | 0.0283480111     |
| U1, snRNA                            | -1.014733191   | 0.269358815 | 0.0025166797     |
| U1, snRNA                            | -1.445161918   | 0.460726251 | 0.0166597792     |
| U1, snRNA                            | -1.326981803   | 0.321800096 | 0.0006947083     |
| U1, snRNA                            | -1.66565654    | 0.574268877 | 0.0306513360     |
| U1, snRNA                            | -1.069413207   | 0.356697509 | 0.0240716790     |
| U1, snRNA                            | -1.726901087   | 0.41970919  | 0.0007195122     |
| U1, snRNA                            | -1.102975606   | 0.400410428 | 0.0433883936     |
| U2, snRNA                            | -1.232312203   | 0.410952299 | 0.0240480456     |
| Uncharacterized, protein coding gene | -1.933139666   | 0.60169903  | 0.0135342776     |
| Uncharacterized, protein coding gene | 1.905796676    | 0.623796145 | 0.0208726764     |
| Uncharacterized, protein coding gene | -1.995596702   | 0.57157043  | 0.0061175426     |
| Uncharacterized, protein coding gene | 1.928264731    | 0.514871474 | 0.0027122828     |
| Uncharacterized, protein coding gene | -1.911452681   | 0.467158967 | 0.0007877909     |



|                                      |              |             |             |
|--------------------------------------|--------------|-------------|-------------|
| Uncharacterized, protein coding gene | -1.986471573 | 0.532331465 | 0.002828763 |
| Uncharacterized, protein coding gene | -2.017095829 | 0.576423466 | 0.005970541 |
| Uncharacterized, protein coding gene | 2.025401108  | 0.555394448 | 0.003749501 |
| Uncharacterized, protein coding gene | -1.563846395 | 0.461975242 | 0.008402365 |
| Uncharacterized, protein coding gene | 2.061546426  | 0.616133904 | 0.009378318 |
| Uncharacterized, protein coding gene | 2.555348475  | 0.619007251 | 0.000683838 |
| Uncharacterized, protein coding gene | -1.139647877 | 0.339222138 | 0.00901955  |
| Uncharacterized, protein coding gene | -1.518735562 | 0.53804125  | 0.037119231 |
| Uncharacterized, protein coding gene | -1.624575962 | 0.284230173 | 5.08E-07    |
| Uncharacterized, protein coding gene | 2.022004175  | 0.443618373 | 0.000121514 |
| Uncharacterized, protein coding gene | -1.61768664  | 0.418021815 | 0.001758043 |
| Uncharacterized, protein coding gene | -1.162516083 | 0.255621731 | 0.000126617 |
| Uncharacterized, protein coding gene | -1.638013714 | 0.285908097 | 4.74E-07    |
| Uncharacterized, protein coding gene | 1.371965493  | 0.258665354 | 4.14E-06    |
| Uncharacterized, protein coding gene | 1.482646386  | 0.365499154 | 0.000895078 |
| Uncharacterized, protein coding gene | 2.713010683  | 0.473453972 | 4.72E-07    |
| Uncharacterized, protein coding gene | 1.626756522  | 0.401549502 | 0.000912203 |
| Uncharacterized, protein coding gene | -1.25020918  | 0.433581882 | 0.031897534 |
| Uncharacterized, protein coding gene | -1.694866145 | 0.552367644 | 0.020181729 |
| Uncharacterized, protein coding gene | -1.063085924 | 0.354387816 | 0.023982871 |
| Uncharacterized, protein coding gene | -1.308148791 | 0.401959738 | 0.012172529 |
| Uncharacterized, protein coding gene | 1.29668225   | 0.457803111 | 0.036320517 |
| Uncharacterized, protein coding gene | -3.046024713 | 0.36104651  | 6.07E-15    |
| Uncharacterized, protein coding gene | 1.922524315  | 0.297448997 | 7.38E-09    |
| Uncharacterized, protein coding gene | -1.517348276 | 0.531397516 | 0.034209873 |
| Uncharacterized, protein coding gene | 1.974158004  | 0.599761901 | 0.010921979 |
| Uncharacterized, protein coding gene | -2.486020759 | 0.621902184 | 0.001109231 |
| Uncharacterized, protein coding gene | 1.232580676  | 0.342633965 | 0.004385015 |
| Uncharacterized, protein coding gene | 1.945539803  | 0.615290419 | 0.015577763 |
| Uncharacterized, protein coding gene | 1.234205389  | 0.188928563 | 4.80E-09    |
| Uncharacterized, protein coding gene | 1.650202315  | 0.291862913 | 7.07E-07    |
| Uncharacterized, protein coding gene | 1.927589165  | 0.416500728 | 8.97E-05    |
| Uncharacterized, protein coding gene | -1.512792643 | 0.450424902 | 0.009037261 |
| Uncharacterized, protein coding gene | 1.63251611   | 0.539472063 | 0.022452808 |
| Uncharacterized, protein coding gene | -1.80652276  | 0.407238847 | 0.000201595 |
| Uncharacterized, protein coding gene | -2.115293302 | 0.512894829 | 0.000694231 |
| Uncharacterized, protein coding gene | -1.057811467 | 0.367014242 | 0.031996069 |
| Uncharacterized, protein coding gene | -1.265387913 | 0.454182148 | 0.040389293 |
| Uncharacterized, protein coding gene | 1.849530269  | 0.527981993 | 0.005908062 |
| Uncharacterized, protein coding gene | -1.437827922 | 0.323602908 | 0.000196567 |
| Uncharacterized, protein coding gene | 1.212735337  | 0.433653732 | 0.039434456 |
| Uncharacterized, protein coding gene | -1.7945427   | 0.438469783 | 0.000784989 |
| Uncharacterized, protein coding gene | -1.436950312 | 0.360679709 | 0.001166587 |
| Uncharacterized, protein coding gene | -1.955336813 | 0.565667042 | 0.006810406 |
| Uncharacterized, protein coding gene | 1.301030322  | 0.217385219 | 1.18E-07    |
| Uncharacterized, protein coding gene | 1.496349487  | 0.533082827 | 0.03851595  |
| Uncharacterized, protein coding gene | -1.683712908 | 0.478184932 | 0.005587368 |

|                                      |              |             |              |
|--------------------------------------|--------------|-------------|--------------|
| Uncharacterized, protein coding gene | -1.543500773 | 0.44847503  | 0.007140324  |
| Uncharacterized, protein coding gene | 1.211047839  | 0.335348392 | 0.004188359  |
| Uncharacterized, protein coding gene | -1.48853763  | 0.530400227 | 0.038558173  |
| Uncharacterized, protein coding gene | 2.797570655  | 0.460432916 | 7.06E-08     |
| Uncharacterized, protein coding gene | 1.69589469   | 0.374547453 | 0.000137677  |
| Uncharacterized, protein coding gene | -2.319976346 | 0.313548338 | 1.58E-11     |
| Uncharacterized, protein coding gene | -2.480623144 | 0.410193509 | 8.31E-08     |
| Uncharacterized, protein coding gene | 1.26539962   | 0.46227205  | 0.04507795   |
| Uncharacterized, protein coding gene | -1.798642605 | 0.598294319 | 0.023573357  |
| Uncharacterized, protein coding gene | 2.614378787  | 0.49793703  | 5.34E-06     |
| Uncharacterized, protein coding gene | 2.225854563  | 0.450853743 | 2.34E-05     |
| Uncharacterized, protein coding gene | 1.654298565  | 0.60828027  | 0.046859282  |
| Uncharacterized, protein coding gene | -1.675412355 | 0.609714394 | 0.043971147  |
| Uncharacterized, protein coding gene | -1.969660408 | 0.435597443 | 0.000141203  |
| Uncharacterized, protein coding gene | 1.417683144  | 0.287554267 | 2.41E-05     |
| Uncharacterized, protein coding gene | -2.015474983 | 0.570425904 | 0.005395293  |
| Uncharacterized, protein coding gene | -1.122098304 | 0.38463252  | 0.029419568  |
| Uncharacterized, protein coding gene | 1.224924029  | 0.423132185 | 0.031025089  |
| Uncharacterized, protein coding gene | 1.535553858  | 0.26509995  | 3.42E-07     |
| Uncharacterized, protein coding gene | -1.68107438  | 0.540437745 | 0.017970602  |
| Uncharacterized, protein coding gene | 4.696933561  | 0.541664753 | 9.17E-16     |
| Uncharacterized, protein coding gene | 2.328512726  | 0.623105624 | 0.002780491  |
| Uncharacterized, protein coding gene | 1.427454121  | 0.426470507 | 0.009349036  |
| Uncharacterized, pseudogene          | -1.691126454 | 0.60009372  | 0.0375803744 |
| Uncharacterized, pseudogene          | -1.526977503 | 0.342770871 | 0.0001875089 |
| Uncharacterized, pseudogene          | -1.900094788 | 0.49162167  | 0.0017855322 |
| Uncharacterized, pseudogene          | -1.787624645 | 0.607664122 | 0.0276693215 |
| Uncharacterized, pseudogene          | 1.726639066  | 0.248904862 | 3.65E-10     |
| Uncharacterized, pseudogene          | 2.563876203  | 0.621069231 | 0.000683838  |
| Uncharacterized, pseudogene          | -1.454774665 | 0.491452454 | 0.026403272  |
| Uncharacterized, pseudogene          | 2.530864155  | 0.596135604 | 0.00043442   |
| Uncharacterized, pseudogene          | 1.279447507  | 0.240395877 | 3.79E-06     |
| Uncharacterized, pseudogene          | -1.572714266 | 0.53636669  | 0.028328353  |
| Uncharacterized, pseudogene          | -1.302418974 | 0.409154935 | 0.014684664  |
| Uncharacterized, pseudogene          | -1.583877606 | 0.29774168  | 3.83E-06     |
| Uncharacterized, pseudogene          | -1.808248925 | 0.597545133 | 0.022452808  |
| Uncharacterized, pseudogene          | -1.267655622 | 0.332509974 | 0.002149166  |
| Uncharacterized, pseudogene          | -1.589911234 | 0.565485026 | 0.038194364  |
| Uncharacterized, pseudogene          | 1.737035901  | 0.612522817 | 0.035972195  |
| Uncharacterized, pseudogene          | 1.042094619  | 0.166522976 | 2.46E-08     |
| Uncharacterized, pseudogene          | -1.646388569 | 0.606580993 | 0.047390225  |
| Uncharacterized, pseudogene          | -1.486817641 | 0.527254078 | 0.037407303  |
| Uncharacterized, pseudogene          | -1.61925242  | 0.496738348 | 0.011992146  |
| Uncharacterized, pseudogene          | -4.133341548 | 0.404714716 | 7.45E-22     |
| Uncharacterized, pseudogene          | 1.44665662   | 0.267840336 | 2.56E-06     |
| Uncharacterized, pseudogene          | 1.666816881  | 0.492924748 | 0.008470791  |
| Uncharacterized, pseudogene          | -1.835723035 | 0.564669005 | 0.01226702   |

Y\_RNA, miscellaneous RNA

-1.398784203 0.480023042

0.0296586135

**Table S2**

| Gene Name | log <sub>2</sub> foldchange | FDR <i>p</i> value | Antigen Presentation Pathway | Hepatic Fibrosis/Hepatic Stellate Cell Activation | Atherosclerosis Signaling | Allograft Rejection Signaling | OX40 Signaling | CDC42 Signaling | Dendritic Cell Maturation | Th1 Pathway | B Cell Development | Th2 Pathway |
|-----------|-----------------------------|--------------------|------------------------------|---------------------------------------------------|---------------------------|-------------------------------|----------------|-----------------|---------------------------|-------------|--------------------|-------------|
| IQGAP2    | 1.01                        | 5.18E-06           |                              |                                                   |                           |                               | X              |                 |                           |             |                    |             |
| CD74      | 2.27                        | 4.72E-38           | X                            |                                                   |                           |                               |                |                 |                           |             |                    |             |
| HLA-DPA1  | 1.44                        | 7.05E-10           | X                            |                                                   | X                         | X                             | X              |                 | X                         |             | X                  |             |
| HLA-DPB1  | 1.74                        | 1.29E-17           | X                            |                                                   | X                         | X                             | X              |                 | X                         |             | X                  |             |
| HLA-DMA   | 1.44                        | 3.12E-09           | X                            |                                                   | X                         | X                             | X              | X               | X                         | X           | X                  | X           |
| HLA-DMB   | 1.61                        | 1.67E-14           | X                            |                                                   | X                         | X                             | X              | X               | X                         | X           | X                  | X           |
| HLA-DQA1  | 1.30                        | 4.14E-07           | X                            |                                                   | X                         | X                             | X              | X               | X                         | X           | X                  | X           |
| HLA-DRB5  | 1.79                        | 3.18E-17           | X                            |                                                   | X                         | X                             | X              | X               | X                         | X           | X                  | X           |
| COL18A1   | 1.10                        | 6.55E-13           |                              | X                                                 | X                         |                               |                |                 | X                         |             |                    |             |
| COL1A1    | 1.53                        | 1.37E-11           |                              | X                                                 | X                         |                               |                |                 | X                         |             |                    |             |
| COL3A1    | 1.52                        | 1.02E-10           |                              | X                                                 | X                         |                               |                |                 | X                         |             |                    |             |
| VCAM1     | 1.18                        | 8.49E-09           |                              | X                                                 | X                         |                               |                |                 |                           |             |                    |             |
| CD14      | 1.25                        | 3.73E-07           |                              | X                                                 |                           |                               |                |                 |                           |             |                    |             |
| FN1       | 1.24                        | 2.33E-12           |                              | X                                                 |                           |                               |                |                 |                           |             |                    |             |
| MMP2      | 1.86                        | 9.46E-24           |                              | X                                                 |                           |                               |                |                 |                           |             |                    |             |
| PDGFRA    | -1.74                       | 8.01E-28           |                              | X                                                 |                           |                               |                |                 |                           |             |                    |             |
| LYZ       | 1.42                        | 6.95E-11           |                              |                                                   | X                         |                               |                |                 |                           |             |                    |             |
| MSR1      | 1.15                        | 1.59E-05           |                              |                                                   | X                         |                               |                |                 |                           |             |                    |             |
| SELPLG    | -1.93                       | 3.77E-30           |                              |                                                   | X                         |                               |                |                 |                           |             |                    |             |



| Gene Name | log <sub>2</sub> foldchange | FDR <i>p</i> value | Neuroinflammation Signaling Pathway | Hepatic Fibrosis / Hepatic Stellate Cell Activation | Granulocyte Adhesion and Diapedesis | Amyotrophic Lateral Sclerosis Signaling | Glutamate Receptor Signaling | Complement System | TREM1 Signaling | Antigen Presentation Pathway | Th1 and Th2 Activation Pathway | Type I Diabetes Mellitus Signaling |
|-----------|-----------------------------|--------------------|-------------------------------------|-----------------------------------------------------|-------------------------------------|-----------------------------------------|------------------------------|-------------------|-----------------|------------------------------|--------------------------------|------------------------------------|
| IL1RL1    | 1.77                        | 2.92E-02           | X                                   | X                                                   |                                     |                                         |                              |                   | X               |                              | X                              |                                    |
| NGFR      | 1.97                        | 2.99E-04           | X                                   | X                                                   |                                     |                                         |                              |                   |                 |                              |                                | X                                  |
| TNFRSF1B  | 1.22                        | 1.81E-05           | X                                   | X                                                   |                                     |                                         |                              |                   |                 |                              |                                | X                                  |
| IL1A      | 2.64                        | 2.17E-10           | X                                   | X                                                   |                                     |                                         |                              |                   |                 |                              |                                |                                    |
| MMP2      | 2.89                        | 6.46E-28           | X                                   | X                                                   |                                     |                                         |                              |                   |                 |                              |                                |                                    |
| CXCL8     | 4.23                        | 4.76E-15           | X                                   | X                                                   | X                                   |                                         |                              |                   | X               |                              |                                |                                    |
| CCL2      | 4.68                        | 6.47E-54           | X                                   | X                                                   | X                                   |                                         |                              |                   | X               |                              |                                |                                    |
| TNF       | 2.38                        | 1.98E-04           | X                                   | X                                                   | X                                   |                                         |                              |                   | X               |                              |                                | X                                  |
| BCL2      | 1.18                        | 4.26E-04           | X                                   | X                                                   |                                     | X                                       |                              |                   |                 |                              |                                | X                                  |
| IL1R1     | 1.37                        | 1.28E-10           | X                                   | X                                                   | X                                   | X                                       |                              |                   |                 |                              |                                | X                                  |
| TNFRSF1A  | 1.15                        | 3.34E-06           | X                                   | X                                                   | X                                   |                                         |                              |                   |                 |                              |                                | X                                  |
| MMP9      | 2.53                        | 8.50E-04           | X                                   | X                                                   | X                                   |                                         |                              |                   |                 |                              |                                |                                    |
| VCAM1     | 1.53                        | 2.90E-07           | X                                   | X                                                   | X                                   |                                         |                              |                   |                 |                              |                                |                                    |
| CD40      | 1.09                        | 1.42E-04           | X                                   | X                                                   |                                     |                                         |                              |                   | X               |                              | X                              |                                    |
| IL10      | 1.73                        | 1.63E-02           | X                                   | X                                                   |                                     |                                         |                              |                   | X               |                              | X                              |                                    |
| TGFBR2    | 1.20                        | 1.87E-05           | X                                   | X                                                   |                                     |                                         |                              |                   |                 |                              | X                              |                                    |
| FAS       | 2.52                        | 9.68E-16           | X                                   | X                                                   |                                     |                                         |                              |                   |                 |                              |                                | X                                  |
| CCL3      | 3.44                        | 3.57E-08           | X                                   |                                                     | X                                   |                                         |                              |                   | X               |                              |                                |                                    |
| CXCL10    | 2.27                        | 2.23E-06           | X                                   |                                                     | X                                   |                                         |                              |                   |                 |                              |                                |                                    |
| BIRC3     | 1.08                        | 3.85E-02           | X                                   |                                                     |                                     | X                                       |                              |                   |                 |                              |                                |                                    |
| CASP1     | 2.05                        | 2.74E-14           | X                                   |                                                     |                                     | X                                       |                              |                   | X               |                              |                                |                                    |
| GRIN1     | -1.66                       | 2.49E-02           | X                                   |                                                     |                                     | X                                       | X                            |                   |                 |                              |                                |                                    |
| GRIN2A    | -1.74                       | 2.64E-02           | X                                   |                                                     |                                     | X                                       | X                            |                   |                 |                              |                                |                                    |
| GRIN2B    | -1.74                       | 1.81E-03           | X                                   |                                                     |                                     | X                                       | X                            |                   |                 |                              |                                |                                    |
| GRIN3A    | -1.30                       | 2.42E-03           | X                                   |                                                     |                                     | X                                       | X                            |                   |                 |                              |                                |                                    |
| SLC1A2    | -2.17                       | 3.19E-18           | X                                   |                                                     |                                     | X                                       | X                            |                   |                 |                              |                                |                                    |
| NLRP3     | 1.22                        | 1.52E-03           | X                                   |                                                     |                                     |                                         |                              |                   | X               |                              |                                |                                    |
| TLR2      | 2.16                        | 4.60E-15           | X                                   |                                                     |                                     |                                         |                              |                   | X               |                              |                                |                                    |
| TLR5      | 1.86                        | 1.63E-06           | X                                   |                                                     |                                     |                                         |                              |                   | X               |                              |                                |                                    |
| TLR8      | 1.87                        | 4.94E-13           | X                                   |                                                     |                                     |                                         |                              |                   | X               |                              |                                |                                    |
| TYROBP    | 1.63                        | 8.94E-08           | X                                   |                                                     |                                     |                                         |                              |                   | X               |                              |                                |                                    |

|          |       |          |   |   |   |   |   |
|----------|-------|----------|---|---|---|---|---|
| PIK3CG   | 1.46  | 2.11E-05 | X | X |   | X |   |
| PIK3R5   | 1.18  | 5.19E-03 | X | X |   | X |   |
| CD86     | 1.11  | 3.53E-03 | X |   | X | X | X |
| CD3D     | 2.21  | 1.76E-03 |   |   |   | X | X |
| CD3E     | 1.51  | 4.65E-02 |   |   |   | X | X |
| IRF1     | 1.01  | 1.60E-05 |   |   |   | X | X |
| SOCS3    | 3.24  | 2.19E-11 |   |   |   | X | X |
| HLA-A    | 1.28  | 2.72E-05 | X |   | X | X | X |
| HLA-DMA  | 3.23  | 4.85E-27 | X |   | X | X | X |
| HLA-DMB  | 3.04  | 1.51E-30 | X |   | X | X | X |
| HLA-DOA  | 3.03  | 1.02E-11 | X |   | X | X | X |
| HLA-DQA1 | 3.82  | 1.80E-23 | X |   | X | X | X |
| HLA-DRB5 | 2.83  | 6.86E-16 | X |   | X | X | X |
| HLA-DPA1 | 3.49  | 4.22E-53 |   |   | X | X |   |
| HLA-DPB1 | 3.90  | 1.80E-39 |   |   | X | X |   |
| HLA-F    | 1.30  | 1.88E-04 |   |   | X |   | X |
| CD74     | 2.95  | 7.33E-35 |   |   | X |   |   |
| MR1      | 1.44  | 1.63E-07 |   |   | X |   |   |
| PSMB9    | 1.13  | 2.71E-06 |   |   | X |   |   |
| PSMB8    | 1.10  | 5.33E-05 |   |   | X |   |   |
| B2M      | 1.44  | 6.33E-11 | X |   | X |   |   |
| IRS1     | -1.16 | 8.35E-03 | X |   |   | X |   |
| JUN      | 1.33  | 5.50E-07 | X |   |   | X |   |
| NFATC2   | 1.07  | 5.12E-03 | X |   |   | X |   |
| CASP8    | 1.18  | 9.95E-06 | X |   |   |   | X |
| GAD1     | -1.38 | 3.90E-02 | X |   |   |   | X |
| MAPK11   | -1.21 | 1.91E-02 | X |   |   |   | X |
| MAPK13   | -1.76 | 4.84E-03 | X |   |   |   | X |
| CD200R1  | 3.13  | 1.55E-13 | X |   |   |   |   |
| CX3CR1   | -1.58 | 6.81E-05 | X |   |   |   |   |
| CYBB     | 2.49  | 4.82E-20 | X |   |   |   |   |
| FOS      | 2.05  | 7.83E-06 | X |   |   |   |   |
| GABBR2   | -1.94 | 1.39E-03 | X |   |   |   |   |
| GABRA1   | -1.53 | 4.04E-02 | X |   |   |   |   |
| GABRA3   | -1.89 | 2.65E-03 | X |   |   |   |   |
| GABRA4   | -1.41 | 1.53E-02 | X |   |   |   |   |
| GABRB2   | -1.67 | 7.56E-03 | X |   |   |   |   |
| GABRB3   | -2.14 | 1.49E-04 | X |   |   |   |   |
| GABRD    | -1.77 | 2.29E-02 | X |   |   |   |   |
| GABRG1   | -1.00 | 1.78E-03 | X |   |   |   |   |
| GABRG2   | -1.57 | 4.87E-02 | X |   |   |   |   |
| HMOX1    | 1.48  | 3.35E-05 | X |   |   |   |   |
| KCNJ3    | -1.81 | 5.51E-03 | X |   |   |   |   |
| KCNJ6    | -1.79 | 6.22E-03 | X |   |   |   |   |
| NCF2     | 2.35  | 2.17E-13 | X |   |   |   |   |
| NGF      | -1.22 | 4.76E-02 | X |   |   |   |   |
| PLA2G2D  | 2.72  | 2.61E-04 | X |   |   |   |   |

|          |       |          |   |   |   |   |   |
|----------|-------|----------|---|---|---|---|---|
| PLA2G4C  | 1.13  | 7.29E-03 | X |   |   |   |   |
| PRKCG    | -1.49 | 2.60E-02 | X |   |   |   |   |
| PYCARD   | 1.41  | 5.91E-05 | X |   |   |   |   |
| TREM2    | 1.74  | 1.17E-07 | X |   |   |   |   |
| IGF1     | -1.38 | 3.81E-03 | X | X |   |   |   |
| IL10RA   | 1.58  | 1.47E-09 | X |   |   |   | X |
| AGTR1    | 1.71  | 2.92E-02 | X |   |   |   |   |
| CD14     | 2.87  | 1.58E-17 | X |   |   |   |   |
| COL19A1  | -1.47 | 3.25E-03 | X |   |   |   |   |
| COL24A1  | -1.12 | 1.55E-02 | X |   |   |   |   |
| COL3A1   | 1.23  | 5.91E-07 | X |   |   |   |   |
| COL4A1   | 1.32  | 4.37E-11 | X |   |   |   |   |
| COL4A3   | -1.58 | 3.32E-05 | X |   |   |   |   |
| COL4A4   | -1.58 | 1.89E-04 | X |   |   |   |   |
| COL8A2   | 1.09  | 6.08E-03 | X |   |   |   |   |
| EDNRB    | -1.44 | 1.76E-09 | X |   |   |   |   |
| EGF      | 1.83  | 4.18E-04 | X |   |   |   |   |
| EGFR     | -1.39 | 6.70E-11 | X |   |   |   |   |
| FGF1     | 1.11  | 2.81E-05 | X |   |   |   |   |
| FN1      | 1.45  | 1.57E-09 | X |   |   |   |   |
| HGF      | 2.74  | 4.75E-29 | X |   |   |   |   |
| IFNAR2   | 1.05  | 8.14E-07 | X |   |   |   |   |
| IGFBP4   | 2.17  | 7.54E-10 | X |   |   |   |   |
| KLF6     | 1.45  | 9.97E-13 | X |   |   |   |   |
| KLF12    | -1.00 | 3.56E-07 | X |   |   |   |   |
| LY96     | 2.75  | 1.94E-09 | X |   |   |   |   |
| PDGFB    | 1.41  | 3.67E-10 | X |   |   |   |   |
| PDGFRA   | -5.88 | 9.79E-78 | X |   |   |   |   |
| SERPINE1 | 2.32  | 6.10E-06 | X |   |   |   |   |
| TIMP1    | 2.36  | 4.95E-08 | X |   |   |   |   |
| ITGB2    | 1.60  | 1.46E-05 |   | X | X |   | X |
| C5AR1    | 1.26  | 4.56E-05 |   | X | X |   |   |
| CCL7     | 3.81  | 9.74E-10 |   | X |   | X |   |
| CXCR4    | 2.60  | 2.90E-10 |   | X |   |   | X |
| CCL4     | 2.28  | 3.38E-04 |   | X |   |   |   |
| CCL8     | 2.28  | 9.87E-04 |   | X |   |   |   |
| CCL18    | 2.27  | 3.85E-03 |   | X |   |   |   |
| CD99     | 1.17  | 6.95E-04 |   | X |   |   |   |
| CXCL1    | 1.50  | 1.26E-02 |   | X |   |   |   |
| CXCL16   | 1.12  | 1.95E-06 |   | X |   |   |   |
| CXCR2    | 1.56  | 1.21E-02 |   | X |   |   |   |
| FPR3     | 3.36  | 2.17E-11 |   | X |   |   |   |
| HRH2     | -1.56 | 1.51E-02 |   | X |   |   |   |
| ICAM2    | 1.33  | 1.08E-05 |   | X |   |   |   |
| IL36G    | 2.47  | 1.29E-03 |   | X |   |   |   |
| ITGA4    | 2.62  | 9.24E-08 |   | X |   |   |   |
| ITGAL    | 1.99  | 3.07E-08 |   | X |   |   |   |



|          |       |          |   |   |   |   |
|----------|-------|----------|---|---|---|---|
| MMP14    | 1.75  | 3.63E-08 | X |   |   |   |
| MMP15    | -1.11 | 1.75E-06 | X |   |   |   |
| MMP16    | -3.06 | 2.59E-21 | X |   |   |   |
| MMP17    | -2.38 | 2.00E-05 | X |   |   |   |
| MMP24    | -1.13 | 1.28E-02 | X |   |   |   |
| MMP25    | 1.63  | 2.38E-02 | X |   |   |   |
| MMP28    | -1.17 | 3.67E-04 | X |   |   |   |
| PECAM1   | 1.53  | 4.30E-17 | X |   |   |   |
| SDC1     | 2.23  | 5.66E-04 | X |   |   |   |
| CACNA1A  | -2.07 | 4.57E-09 |   | X |   |   |
| CACNA1C  | -1.13 | 4.98E-03 |   | X |   |   |
| CACNA1E  | -1.30 | 4.39E-02 |   | X |   |   |
| CAPN6    | -2.23 | 4.96E-05 |   | X |   |   |
| CASP12   | 1.61  | 3.46E-04 |   | X |   |   |
| GPX1     | 3.17  | 6.83E-36 |   | X |   |   |
| HECW1    | -1.82 | 2.45E-03 |   | X |   |   |
| NEFH     | -1.72 | 9.21E-03 |   | X |   |   |
| NEFL     | -1.67 | 4.12E-02 |   | X |   |   |
| NEFM     | -1.42 | 3.12E-02 |   | X |   |   |
| PRPH     | 2.65  | 2.86E-04 |   | X |   |   |
| CALM1    | -1.10 | 6.15E-05 |   |   | X |   |
| CAMK4    | -1.58 | 1.04E-02 |   |   | X |   |
| GRM1     | -1.47 | 4.12E-02 |   |   | X |   |
| GRM2     | -1.92 | 6.81E-03 |   |   | X |   |
| GRM4     | -1.31 | 3.02E-02 |   |   | X |   |
| GRM5     | -1.88 | 2.00E-04 |   |   | X |   |
| GRM7     | -1.33 | 8.05E-03 |   |   | X |   |
| HOMER1   | -1.27 | 2.90E-06 |   |   | X |   |
| SLC17A7  | -1.77 | 1.99E-02 |   |   | X |   |
| C2       | 2.86  | 9.77E-26 |   |   |   | X |
| C7       | 1.37  | 3.91E-05 |   |   |   | X |
| C1QA     | 2.44  | 2.73E-16 |   |   |   | X |
| C1QC     | 2.67  | 4.80E-20 |   |   |   | X |
| C1R      | 2.15  | 2.84E-10 |   |   |   | X |
| C1S      | 2.20  | 1.05E-09 |   |   |   | X |
| C3AR1    | 1.46  | 3.37E-07 |   |   |   | X |
| C4BPB    | -1.77 | 9.38E-03 |   |   |   | X |
| CD59     | 1.18  | 5.62E-12 |   |   |   | X |
| CFB      | 2.62  | 3.63E-34 |   |   |   | X |
| CFD      | 1.12  | 7.29E-03 |   |   |   | X |
| CFI      | 1.30  | 7.08E-05 |   |   |   | X |
| CR1      | 2.55  | 1.50E-05 |   |   |   | X |
| SERPING1 | 1.21  | 2.49E-05 |   |   |   | X |
| CIITA    | 2.26  | 4.19E-16 |   |   | X | X |
| NLRC5    | 1.36  | 1.72E-06 |   |   | X | X |
| CASP5    | 2.60  | 3.09E-07 |   |   | X |   |
| CD83     | 1.95  | 1.87E-09 |   |   | X |   |

|        |       |          |   |   |
|--------|-------|----------|---|---|
| FCGR2B | 6.11  | 3.01E-39 | X |   |
| LAT2   | 1.14  | 1.38E-03 | X |   |
| TREM1  | 5.84  | 5.05E-25 | X |   |
| STAT5A | 1.09  | 3.12E-05 | X | X |
| CD274  | 1.08  | 1.86E-02 |   | X |
| HAVCR2 | 1.66  | 5.12E-04 |   | X |
| IKZF1  | 1.18  | 1.03E-03 |   | X |
| IL24   | 1.70  | 4.41E-02 |   | X |
| IL10RB | 1.27  | 6.71E-06 |   | X |
| IL2RG  | 1.15  | 3.13E-03 |   | X |
| LGALS9 | 2.49  | 1.06E-08 |   | X |
| PTGDR2 | -1.29 | 3.50E-04 |   | X |
| RUNX3  | 2.73  | 4.59E-05 |   | X |
| SPI1   | 1.62  | 1.20E-05 |   | X |
| STAT6  | 1.42  | 4.34E-09 |   | X |
| VAV1   | 1.72  | 8.44E-06 |   | X |
| FCER1G | 2.22  | 2.75E-12 |   | X |
| GZMB   | 2.49  | 3.84E-04 |   | X |
| NFKBID | 1.40  | 2.72E-03 |   | X |
| PRF1   | 1.75  | 6.47E-03 |   | X |



CFB

1.21

1.96E-07 X

Fig. S1

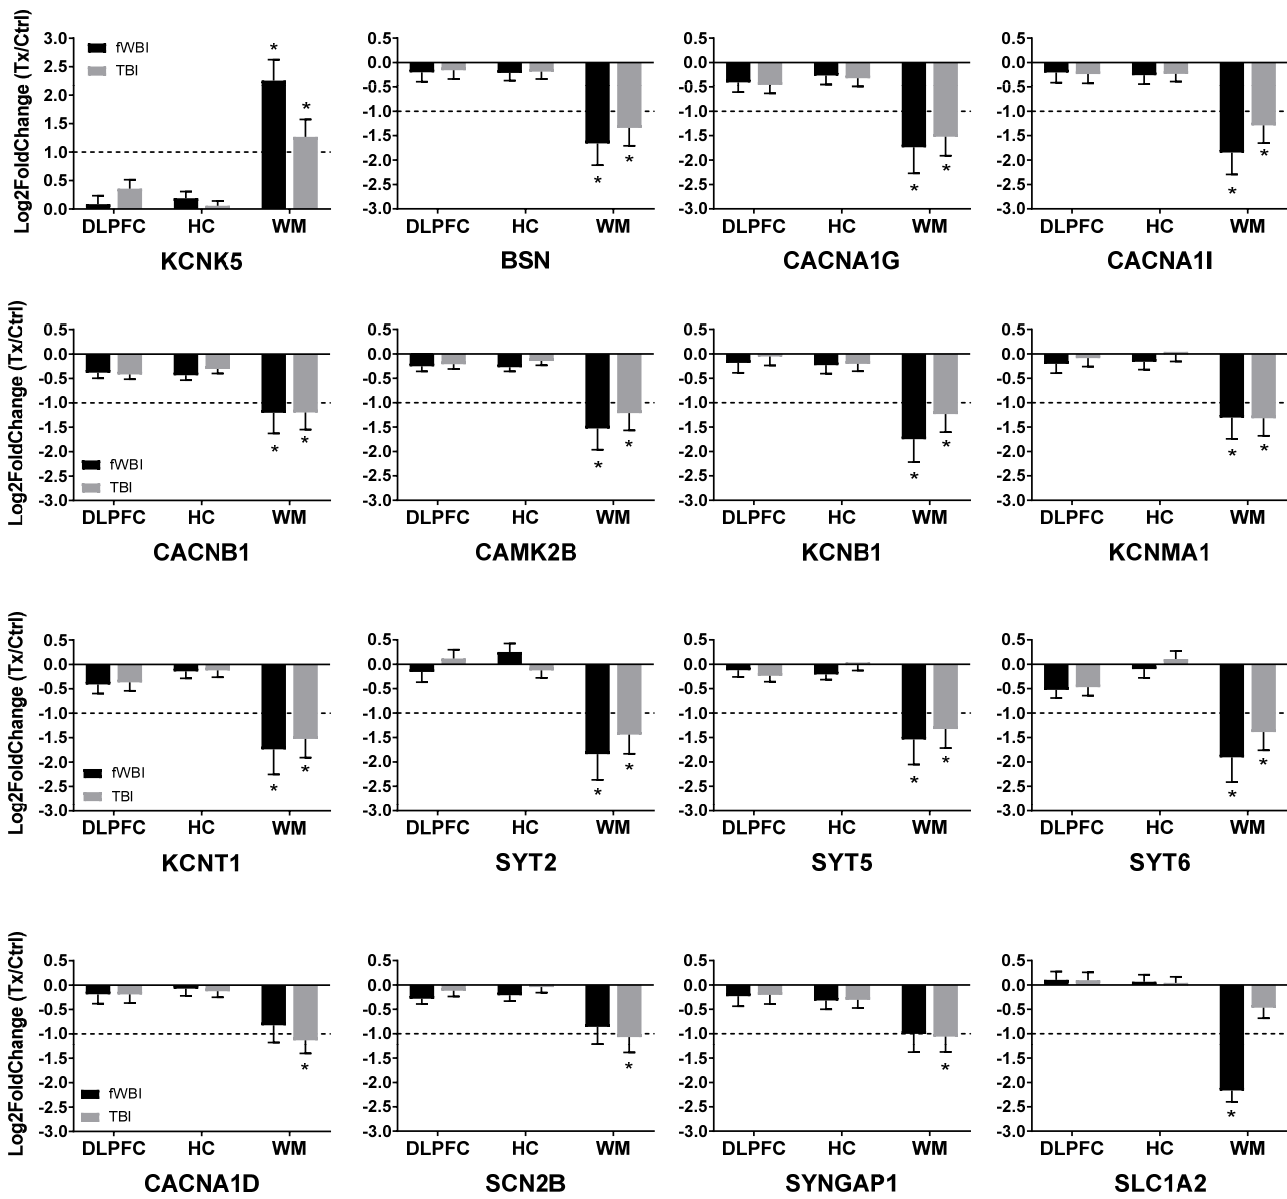

Supplement: NIHMS1017250-supplement-Supplementary_file.pdf [file NIHMS1017250-supplement-Supplementary_file.pdf]
